# Supplementary material for: Antigen-Bound and Free β-Amyloid Autoantibodies in Serum of Healthy Adults
Source: PubMed Central journal article supplement (PMC3433427; doi:10.1371/journal.pone.0044516), 2012-09-04

# Biotin-G<sub>5</sub>-VHHQKLVFFAEDVGSNKGAIIGLMVGGVV-NH<sub>2</sub>

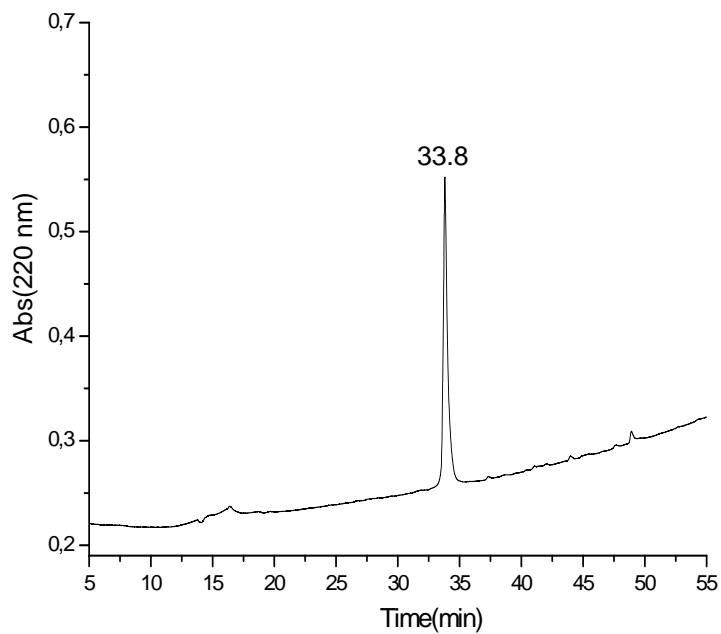

Vydac C<sub>4</sub> column

Eluents: 0.1% TFA in water (A), 0.1% TFA in MeCN: water 80:20 (B)

Gradient: 0 min 0% B, 5 min 0% B, 55 min 100% B

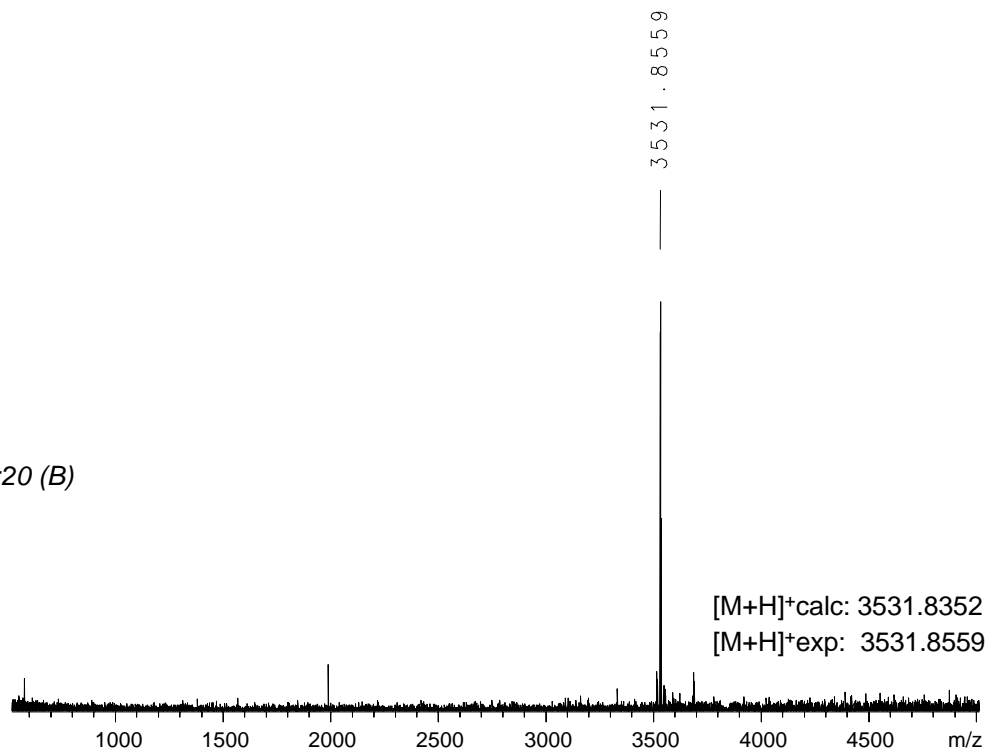

Supplement: pone.0044516.s001.pdf [file pone.0044516.s001.pdf]
