# Supplementary material for: Antigen-Bound and Free β-Amyloid Autoantibodies in Serum of Healthy Adults
Source: PubMed Central journal article supplement (PMC3433427; doi:10.1371/journal.pone.0044516), 2012-09-04

**A**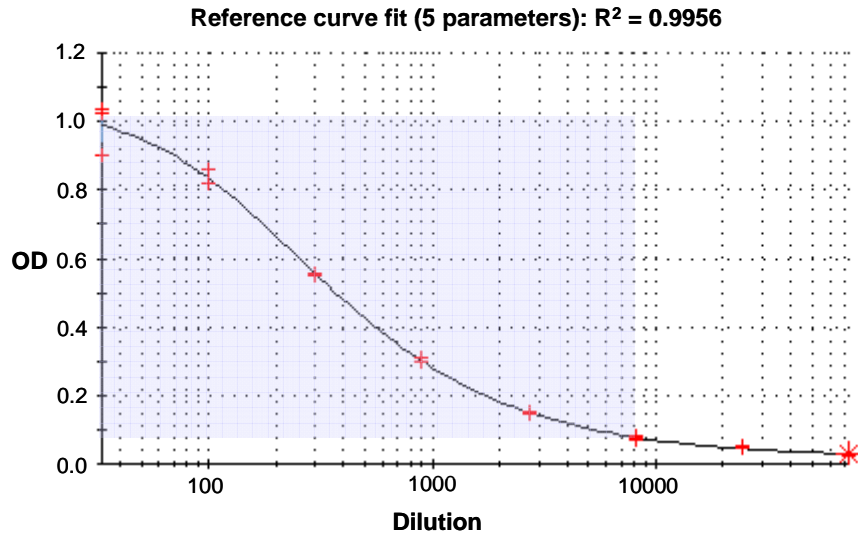**B**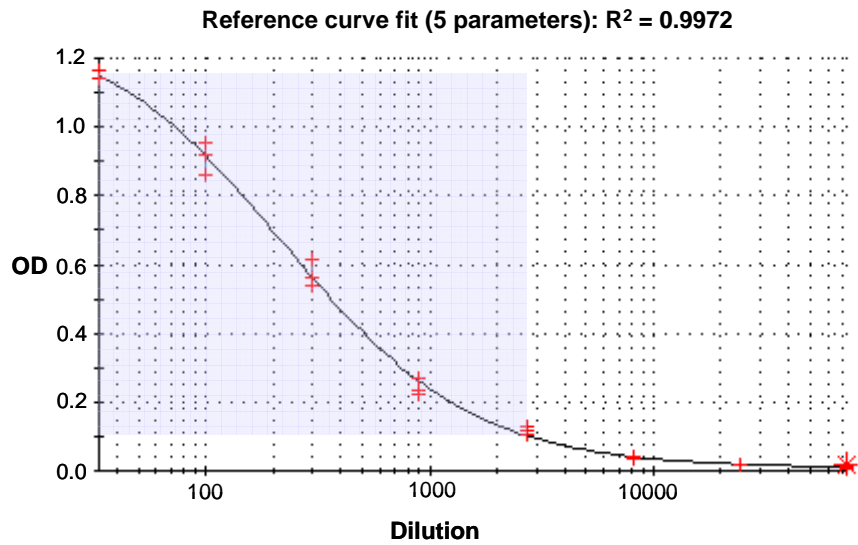

Supplement: pone.0044516.s006.pdf [file pone.0044516.s006.pdf]
